# Supplementary material for: Molecular Landscape and Validation of New Genomic Classification in 2668 Adult AML Patients: Real Life Data from the PETHEMA Registry
Source: MDPI journal article supplement (doi:10.3390/cancers15020438), 2023-01-10
Supplement: s1 [file s1]

**SUPPLEMENTARY MATERIAL:**

Table S1. Description of the sequencing technology, NGS panel and NGS platform used by each reference laboratory.

| Centers | Amplicon/Capture | Commercial or custom panel                                 | Platform                                |
|---------|------------------|------------------------------------------------------------|-----------------------------------------|
| HULF    | Amplicon         | Comercial: Oncomine Myeloid Reserach Assay (Thermo Fisher) | Ion S5 System (Thermo Fisher)           |
| HUVR    | Amplicon         | Comercial: Oncomine Myeloid Reserach Assay (Thermo Fisher) | Ion GeneStudio S5 Prime (Thermo Fisher) |
| H12O    | Amplicon         | Custom: Ampliseq (Thermo Fisher)                           | Ion S5 System (Thermo Fisher)           |
| HURS    | Capture          | Comercial: Myeloid Tumor Solution (SOPHiA GENETICS)        | MiSeq System (Illumina)                 |
| HUDN    | Capture          | Comercial: Myeloid Tumor Solution (SOPHiA GENETICS)        | MiSeq System (Illumina)                 |
| HUS     | Capture          | Custom: PanMyeloid (SOPHiA GENETICS)                       | MiSeq System (Illumina)                 |
| UNAV    | Capture          | Custom: PanMyeloid (SOPHiA GENETICS)                       | MiSeq System (Illumina)                 |

HULF: Hospital Universitario La Fe, HUVR: Hospital Universitario Virgen del Rocío, H12O: Hospital Universitario 12 de Octubre, HURS: Hospital Universitario Reina Sofía, HUDN: Hospital Universitario de Gran Canaria Dr. Negrín, HUS: Hospital Universitario de Salamanca, UNAV: CIMA LAB Diagnostics.

Table S2. Detailed gene panel composition

| Genes         | HULF, HUVR                      | HURS, HUDN                | H12O      | HUS, UNAV              |
|---------------|---------------------------------|---------------------------|-----------|------------------------|
| <i>ABL1</i>   | 4 to 9                          | 4 to 9                    | -         | -                      |
| <i>ASXL1</i>  | All exons                       | 10, 12, 13                | All exons | 12                     |
| <i>BCOR</i>   | All exons                       | -                         | All exons | All exons              |
| <i>BRAF</i>   | 2 to 4, 6, 8, 11, 15, 17 and 18 | 15                        | -         | -                      |
| <i>CALR</i>   | All exons                       | 9                         | All exons | 9                      |
| <i>CBL</i>    | 8, 9                            | 8, 9                      | All exons | 8, 9                   |
| <i>CEBPA</i>  | All exons                       | All exons                 | All exons | All exons              |
| <i>CSF3R</i>  | 14, 17                          | All exons                 | All exons | 14 to 17               |
| <i>DNMT3A</i> | 11 to 23                        | All exons                 | All exons | All exons              |
| <i>ETV6</i>   | All exons                       | All exons                 | All exons | All exons              |
| <i>EZH2</i>   | All exons                       | All exons                 | All exons | All exons              |
| <i>FLT3</i>   | 8, 11, 13 to 16, 20, 23, 24     | 13 to 15 and 20           | All exons | 14 to 16 and 20        |
| <i>GATA2</i>  | 4, 5                            | -                         | -         | 2 to 6                 |
| <i>HRAS</i>   | 2, 3                            | 2, 3                      | -         | -                      |
| <i>IDH1</i>   | 4                               | 4                         | All exons | 4                      |
| <i>IDH2</i>   | 4                               | 4                         | All exons | 4                      |
| <i>JAK2</i>   | 12 to 15                        | All exons                 | All exons | 12 to 15               |
| <i>KIT</i>    | 1, 2, 8 to 11, 13, 17           | 2, 8 to 11, 13, 17 and 18 | All exons | 2, 8 to 11, 13, 14, 17 |
| <i>KRAS</i>   | 2 to 6                          | 2, 3                      | All exons | 2 to 4                 |
| <i>MPL</i>    | 3, 4, 10, 12                    | 10                        | All exons | 3 to 6, 10, 12         |
| <i>NPM1</i>   | 11                              | 10, 11                    | All exons | 10, 11                 |
| <i>NRAS</i>   | 2 to 4                          | 2, 3                      | All exons | 2 to 4                 |
| <i>PTPN11</i> | 3, 12, 13                       | 3, 7 to 13                | -         | 3, 7, 13               |
| <i>RUNX1</i>  | All exons                       | All exons                 | All exons | All exons              |
| <i>SETBP1</i> | 4                               | 4                         | All exons | 4                      |
| <i>SF3B1</i>  | 14 to 21                        | 10 to 16                  | All exons | 11 to 16               |
| <i>SRSF2</i>  | 1                               | 1                         | All exons | 1                      |
| <i>STAG2</i>  | All exons                       | -                         | All exons | All exons              |
| <i>TET2</i>   | All exons                       | All exons                 | All exons | All exons              |
| <i>TP53</i>   | All exons                       | All exons                 | All exons | All exons              |
| <i>U2AF1</i>  | 2, 6                            | 2, 6                      | All exons | 2, 6                   |
| <i>WT1</i>    | 7, 9                            | 6 to 10                   | All exons | 7, 9                   |
| <i>ZRSR2</i>  | All exons                       | All exons                 | All exons | All exons              |

HULF: Hospital Universitario La Fe, HUVR: Hospital Universitario Virgen del Rocío, H12O: Hospital Universitario 12 de Octubre, HURS: Hospital Universitario Reina Sofía, HUDN: Hospital Universitario de Gran Canaria Dr. Negrín, HUS: Hospital Universitario de Salamanca, UNAV: CIMA LAB Diagnostics.

Table S3. Genomic groups and integrated risk score based on 16 molecular classes defined by Tazi *et al.*, 2022 in the updated genomic classification of AML.

| Hierarchical model                                                                                                                                                | Molecular classes             | Risk groups |              |         |
|-------------------------------------------------------------------------------------------------------------------------------------------------------------------|-------------------------------|-------------|--------------|---------|
|                                                                                                                                                                   |                               | Favorable   | Intermediate | Adverse |
| 1. WHO 2016 Set 1                                                                                                                                                 | <i>NPM1</i>                   |             |              |         |
|                                                                                                                                                                   | t(8;21)                       |             |              |         |
|                                                                                                                                                                   | inv(16)                       |             |              |         |
| 2. <i>TP53</i> and/or complex karyotype (CK)                                                                                                                      | <i>TP53</i> ±CK               |             |              |         |
| 3. WHO 2016 Set 2                                                                                                                                                 | <i>CEBPA</i> bi               |             |              |         |
|                                                                                                                                                                   | t(11;x)                       |             |              |         |
|                                                                                                                                                                   | t(6;9)                        |             |              |         |
|                                                                                                                                                                   | inv(3)                        |             |              |         |
| 4. sAML1: Single mutation in one of the following genes: <i>SRSF2</i> , <i>SF3B1</i> , <i>U2AF1</i> , <i>ASXL1</i> , <i>EZH2</i> , <i>RUNX1</i> and <i>SETBP1</i> | sAML1                         |             |              |         |
| 5. sAML2: Two or more mutations in sAML1 defining genes. *In this subset, <i>DNMT3A</i> and <i>TET2</i> account as a second hit                                   | sAML2                         |             |              |         |
| 6. <i>WT1</i>                                                                                                                                                     | <i>WT1</i>                    |             |              |         |
| 7. Trisomies: Presence of ≥1 trisomies                                                                                                                            | Trisomies                     |             |              |         |
| 8. <i>DNMT3A</i> + <i>IDH1/2</i>                                                                                                                                  | <i>DNMT3A</i> + <i>IDH1/2</i> |             |              |         |
| 9. Not class defining mutations                                                                                                                                   | mNOS                          |             |              |         |
| 10. No events                                                                                                                                                     | No events                     |             |              |         |

Table S4. Third Cross-validation round results

| Cross-Validation Round |        |                  |                  |                      |          |          |            |          |      |
|------------------------|--------|------------------|------------------|----------------------|----------|----------|------------|----------|------|
| VAF≥5% variants        |        |                  |                  |                      |          |          |            |          |      |
| Variant ID             | Gene   | NM               | Coding           | Protein              | Detected | Included | Error Rate | Mean VAF | SD   |
| 1                      | JAK2   | (NM_004972)      | c.1849G>T        | p.(Val617Phe)        | 8        | 8        | 0,0%       | 80,9%    | 2,0% |
| 2                      | TP53   | (NM_000546.5)    | c.833C>T         | p.(Pro278Leu)        | 8        | 8        | 0,0%       | 80,3%    | 2,5% |
| 3                      | RUNX1  | (NM_001754.4)    | c.592G>A         | p.(Asp198Asn)        | 8        | 8        | 0,0%       | 63,2%    | 2,0% |
| 4                      | SRSF2  | (NM_003016.4)    | c.284C>A         | p.(Pro95His)         | 8        | 8        | 0,0%       | 49,6%    | 3,8% |
| 5                      | IDH2   | (NM_002168.3)    | c.419G>A         | p.(Arg140Gln)        | 8        | 8        | 0,0%       | 46,8%    | 1,8% |
| 6                      | DNMT3A | (NM_022552.4)    | c.2644C>T        | p.(Arg882Cys)        | 8        | 8        | 0,0%       | 44,1%    | 1,5% |
| 7                      | ASXL1  | (NM_015338)      | c.1934dup        | p.(Gly646Trpfs*12)   | 5        | 8        | 37,5%      | 43,5%    | 4,5% |
| 8                      | IDH1   | (NM_005896.3)    | c.395G>A         | p.(Arg132His)        | 8        | 8        | 0,0%       | 41,3%    | 1,9% |
| 9                      | NPM1   | (NM_002520.6)    | c.860_863dup     | p.(Trp288Cysfs*12)   | 8        | 8        | 0,0%       | 41,1%    | 7,9% |
| 10                     | NPM1   | (NM_002520.6)    | c.860_863dup     | p.(Trp288Cysfs*12)   | 8        | 8        | 0,0%       | 37,3%    | 4,4% |
| 11                     | TET2   | (NM_001127208.2) | c.3814G>C        | p.(Ala1272Pro)       | 7        | 8        | 12,5%      | 31,3%    | 5,8% |
| 12                     | FLT3   | (NM_004119.2)    | c.2027A>C        | p.(Asn676Thr)        | 6        | 8        | 25,0%      | 22,8%    | 1,9% |
| 13                     | CSF3R  | (NM_156039.3)    | c.2308C>T        | p.(Gln770*)          | 6        | 8        | 12,5%      | 15,7%    | 0,8% |
| 14                     | FLT3   | (NM_004119.2)    | c.2504A>T        | p.(Asp835Val)        | 8        | 8        | 0,0%       | 14,1%    | 0,9% |
| 15                     | FLT3   | (NM_004119.2)    | c.1770_1796dup   | p.(Tyr591_Tyr599dup) | 7        | 8        | 12,5%      | 13,2%    | 3,5% |
| 16                     | KRAS   | (NM_033360.3)    | c.182A>C         | p.(Gln61Pro)         | 8        | 8        | 0,0%       | 13,1%    | 2,4% |
| 17                     | NRAS   | (NM_002524.4)    | c.35G>A          | p.(Gly12Asp)         | 8        | 8        | 0,0%       | 10,3%    | 1,1% |
| 18                     | PTPN11 | (NM_002834)      | c.218C>T         | p.(Thr73Ile)         | 7        | 8        | 12,5%      | 7,5%     | 1,0% |
| 19                     | SETBP1 | (NM_015559.2)    | c.2602G>A        | p.(Asp868Asn)        | 8        | 8        | 0,0%       | 7,3%     | 0,5% |
| 20                     | CSF3R  | (NM_156039.3)    | c.2296C>T        | p.(Gln766*)          | 6        | 8        | 12,5%      | 5,6%     | 0,7% |
| 21                     | NRAS   | (NM_002524.4)    | c.35G>A          | p.(Gly12Asp)         | 8        | 8        | 0,0%       | 5,0%     | 0,9% |
| VAF<5% variants        |        |                  |                  |                      |          |          |            |          |      |
| 22                     | FLT3   | (NM_004119.2)    | c.2522A>T        | p.(Asn841Ile)        | 7        | 8        | 12,5%      | 3,7%     | 0,7% |
| 23                     | TP53   | (NM_000546.5)    | c.742C>G         | p.(Arg248Gly)        | 6        | 8        | 25,0%      | 2,4%     | 0,5% |
| 24                     | FLT3   | (NM_004119.2)    | c.2505T>A        | p.(Asp835Glu)        | 4        | 8        | 50,0%      | 1,6%     | 0,2% |
| 25                     | KRAS   | (NM_033360.3)    | c.38G>A          | p.(Gly13Asp)         | 3        | 8        | 62,5%      | 1,9%     | 0,8% |
| 26                     | JAK2   | (NM_004972)      | c.1849G>T        | p.(Val617Phe)        | 1        | 8        | 87,5%      | 1,4%     | N/A  |
| 27                     | NRAS   | (NM_002524.4)    | c.35G>A          | p.(Gly12Asp)         | 4        | 8        | 50,0%      | 1,4%     | 0,2% |
| 28                     | PTPN11 | (NM_002834)      | c.1505C>T        | p.(Ser502Leu)        | 3        | 8        | 62,5%      | 1,1%     | 0,1% |
| 29                     | PTPN11 | (NM_002834)      | c.213T>G         | p.(Phe71Leu)         | 1        | 8        | 87,5%      | 1,0%     | N/A  |
| 30                     | FLT3   | (NM_004119.2)    | c.1812_1813ins30 | p.(Glu604_605ins10)  | 4        | 8        | 50,0%      | 1,0%     | 0,2% |
| 31                     | PTPN11 | (NM_002834)      | c.227A>G         | p.(Glu76Gly)         | 1        | 8        | 87,5%      | 1,0%     | N/A  |
| 32                     | FLT3   | (NM_004119.2)    | c.1740_1788dup   | p.(Tyr597Glyfs*18)   | 5        | 8        | 37,5%      | 0,8%     | 0,4% |

Detected: number of centers which have detected the variant; Included: number of centers which include variant region in its next-generation sequencing assay; Error Rate: percentage of centers which failed variant detection; VAF: variant allele frequency; SD: VAF standard deviation; NA: not applicable: variants only were detected by one center.

Table S5. Molecular alterations pertaining to described functional categories.

| Functional categories             | Molecular alterations                                                                                                          |
|-----------------------------------|--------------------------------------------------------------------------------------------------------------------------------|
| Transcription factor (TF) fusions | -                                                                                                                              |
| <i>NPM1</i>                       | <i>NPM1</i>                                                                                                                    |
| Tumor suppressors                 | <i>TP53</i> and <i>WT1</i>                                                                                                     |
| DNA methylation                   | <i>DNMT3A</i> , <i>IDH1</i> , <i>IDH2</i> and <i>TET2</i>                                                                      |
| Activating signaling              | <i>ABL1</i> , <i>BRAF</i> , <i>FLT3</i> , <i>HRAS</i> , <i>JAK2</i> , <i>KIT</i> , <i>KRAS</i> , <i>NRAS</i> and <i>PTPN11</i> |
| Myeloid TF                        | <i>CEBPA</i> , <i>ETV6</i> , <i>GATA2</i> and <i>RUNX1</i>                                                                     |
| Chromatin modifiers               | <i>ASXL1</i> and <i>EZH2</i>                                                                                                   |
| Spliceosome                       | <i>SF3B1</i> , <i>SRSF2</i> and <i>U2AF1</i>                                                                                   |
| Cohesin                           | -                                                                                                                              |

Table S6. Mutational frequency distribution according to moment disease, age and sex. Bold format means statistically significant values.

| Genes         | A) Disease status |              |                |                  | B) Age       |              |                  | C) Sex       |              |                  |
|---------------|-------------------|--------------|----------------|------------------|--------------|--------------|------------------|--------------|--------------|------------------|
|               | Diagnosis         | Relapse      | Refractoriness | P                | ≤65 years    | >65 years    | P                | Male         | Female       | P                |
|               | %                 | %            | %              |                  | %            | %            |                  | %            | %            |                  |
| <i>ABL1</i>   | 0.3%              | 0.9%         | 1.2%           | <b>0.018</b>     | 0.3%         | 0.3%         | <b>&lt;0.001</b> | 0.2%         | 0.4%         | <b>&lt;0.001</b> |
| <i>ASXL1</i>  | 14.7%             | 16.3%        | 14.6%          |                  | <b>10.2%</b> | <b>18.4%</b> |                  | <b>17.7%</b> | <b>10.8%</b> |                  |
| <i>BRAF</i>   | 0.6%              | 0.0%         | 1.2%           |                  | 0.6%         | 0.5%         |                  | 0.4%         | 0.8%         |                  |
| <i>CALR</i>   | 1.6%              | 3.6%         | 1.2%           |                  | 1.4%         | 1.8%         | <b>0.032</b>     | 1.7%         | 1.5%         | <b>0.025</b>     |
| <i>CBL</i>    | 3.7%              | 2.8%         | 2.9%           |                  | 3.5%         | 3.9%         |                  | <b>4.5%</b>  | <b>2.8%</b>  |                  |
| <i>CEBPA</i>  | 6.2%              | 6.8%         | 3.5%           |                  | 6.4%         | 6.1%         |                  | 6.9%         | 5.4%         |                  |
| <i>CSF3R</i>  | 2.8%              | 3.6%         | 2.3%           |                  | 2.9%         | 2.7%         | <b>0.032</b>     | 2.6%         | 3.0%         | <b>&lt;0.001</b> |
| <i>DNMT3A</i> | <b>23.8%</b>      | <b>31.5%</b> | <b>21.6%</b>   |                  | <b>25.9%</b> | <b>22.1%</b> |                  | <b>20.6%</b> | <b>27.9%</b> |                  |
| <i>ETV6</i>   | 3.1%              | 4.8%         | 2.3%           |                  | 2.5%         | 3.6%         |                  | 3.7%         | 2.4%         |                  |
| <i>EZH2</i>   | 5.5%              | 5.2%         | 5.8%           |                  | <b>3.0%</b>  | <b>7.5%</b>  | <b>&lt;0.001</b> | <b>7.0%</b>  | <b>3.5%</b>  | <b>&lt;0.001</b> |
| <i>FLT3</i>   | 24.9%             | 24.3%        | 22.2%          | <b>0.017</b>     | <b>29.4%</b> | <b>21.3%</b> | <b>&lt;0.001</b> | <b>22.2%</b> | <b>28.3%</b> | <b>&lt;0.001</b> |
| <i>GATA2</i>  | 2.8%              | 4.4%         | 4.1%           |                  | 3.4%         | 2.2%         | <b>&lt;0.001</b> | 3.0%         | 2.4%         | <b>0.01</b>      |
| <i>IDH1</i>   | <b>9.7%</b>       | <b>15.1%</b> | <b>8.2%</b>    |                  | 8.8%         | 10.4%        |                  | 9.2%         | 10.4%        |                  |
| <i>IDH2</i>   | 14.7%             | 15.5%        | 15.2%          |                  | <b>12.4%</b> | <b>16.5%</b> | <b>&lt;0.001</b> | 15.5%        | 13.6%        |                  |
| <i>JAK2</i>   | 5.4%              | 3.2%         | 5.8%           |                  | <b>3.6%</b>  | <b>6.9%</b>  | <b>&lt;0.001</b> | <b>6.4%</b>  | <b>4.1%</b>  |                  |
| <i>KIT</i>    | 3.4%              | 4.4%         | 1.8%           |                  | 4.2%         | 2.8%         | <b>&lt;0.001</b> | 3.3%         | 3.5%         | <b>&lt;0.001</b> |
| <i>KRAS</i>   | <b>8.2%</b>       | <b>3.6%</b>  | <b>4.1%</b>    |                  | 7.6%         | 8.6%         |                  | 8.6%         | 7.6%         |                  |
| <i>MPL</i>    | 1.8%              | 1.6%         | 1.2%           |                  | 2.0%         | 1.7%         |                  | 1.4%         | 2.4%         |                  |
| <i>NPM1</i>   | <b>23.3%</b>      | <b>23.1%</b> | <b>9.4%</b>    | <b>&lt;0.001</b> | <b>29.2%</b> | <b>18.5%</b> | <b>&lt;0.001</b> | <b>19.8%</b> | <b>27.7%</b> | <b>&lt;0.001</b> |
| <i>NRAS</i>   | <b>16.2%</b>      | <b>8.0%</b>  | <b>17.5%</b>   | <b>&lt;0.001</b> | <b>19.1%</b> | <b>13.9%</b> | <b>&lt;0.001</b> | 15.9%        | 16.5%        | <b>&lt;0.001</b> |
| <i>PTPN11</i> | 5.8%              | 4.8%         | 5.3%           | <b>0.037</b>     | <b>7.3%</b>  | <b>4.5%</b>  | <b>&lt;0.001</b> | 5.8%         | 5.7%         |                  |
| <i>RUNX1</i>  | <b>18.2%</b>      | <b>23.5%</b> | <b>23.4%</b>   |                  | <b>13.4%</b> | <b>21.9%</b> | <b>&lt;0.001</b> | <b>21.1%</b> | <b>14.2%</b> |                  |
| <i>SETBP1</i> | 3.0%              | 4.8%         | 4.7%           |                  | 2.3%         | 3.5%         | <b>0.028</b>     | 3.3%         | 2.6%         | <b>&lt;0.001</b> |
| <i>SF3B1</i>  | 5.7%              | 7.2%         | 9.5%           | <b>0.016</b>     | <b>4.5%</b>  | <b>6.7%</b>  |                  | 5.8%         | 5.7%         |                  |
| <i>SRSF2</i>  | 16.1%             | 12.7%        | 16.4%          |                  | <b>8.1%</b>  | <b>22.5%</b> | <b>&lt;0.001</b> | <b>20.9%</b> | <b>9.8%</b>  |                  |
| <i>TET2</i>   | 22.0%             | 19.1%        | 19.9%          | <b>0.016</b>     | <b>14.3%</b> | <b>28.2%</b> | <b>&lt;0.001</b> | <b>23.8%</b> | <b>19.7%</b> | <b>0.014</b>     |
| <i>TP53</i>   | <b>17.9%</b>      | <b>11.2%</b> | <b>20.5%</b>   |                  | <b>12.7%</b> | <b>22.0%</b> | <b>&lt;0.001</b> | 17.2%        | 18.8%        | <b>&lt;0.001</b> |
| <i>U2AF1</i>  | 6.5%              | 3.2%         | 8.2%           |                  | <b>4.9%</b>  | <b>7.7%</b>  | <b>&lt;0.001</b> | <b>8.9%</b>  | <b>3.2%</b>  |                  |
| <i>WT1</i>    | <b>4.8%</b>       | <b>11.6%</b> | <b>10.5%</b>   | <b>&lt;0.001</b> | <b>6.3%</b>  | <b>3.5%</b>  | <b>&lt;0.001</b> | 4.1%         | 5.6%         |                  |

Table S7. Hazard ratio for A) molecular classes, B) Risk score in global cohort, C) Risk score in <65 years-old, D) Risk score in ≥65 years-old.

|                                     | Hazard<br>ratio | (95% CI) |          | <i>P</i> |
|-------------------------------------|-----------------|----------|----------|----------|
|                                     |                 | Lower IC | Upper IC |          |
| A) Molecular classes                |                 |          |          |          |
| <i>NPM1</i>                         | Reference       |          |          | -        |
| <i>CEBPA</i> bZIP                   | 0,3             | 0,0      | 2,0      | 0.201    |
| inv(3)                              | 3,9             | 2,1      | 7,2      | <0.001   |
| sAML1                               | 1,4             | 1,0      | 2,1      | 0.051    |
| sAML2                               | 2,1             | 1,6      | 2,7      | <0.001   |
| <i>WT1</i>                          | 2,3             | 1,1      | 5,0      | <0.05    |
| Trisomies                           | 0,9             | 0,2      | 3,6      | 0.855    |
| <i>DNMT3A/IDH1-2</i>                | 1,4             | 0,7      | 3,1      | 0.348    |
| Not class defining mutations        | 0,9             | 0,6      | 1,4      | 0.753    |
| No events                           | 0,5             | 0,1      | 2,2      | 0.402    |
| t(X;11)                             | 1,8             | 0,9      | 3,4      | 0.093    |
| inv(16)                             | 0,9             | 0,5      | 1,8      | 0.758    |
| <i>TP53</i> -CK                     | 3,5             | 2,6      | 4,6      | <0.001   |
| t(8;21)                             | 1,3             | 0,6      | 2,7      | 0.465    |
| B) Risk score in global cohort      |                 |          |          |          |
| Favorable                           | Reference       |          |          | -        |
| Intermediate                        | 1,5             | 1,1      | 2,0      | <0.01    |
| Adverse                             | 2,7             | 2,1      | 3,5      | <0.001   |
| C) Risk classification in <65 years |                 |          |          |          |
| Favorable                           | Reference       |          |          | -        |
| Intermediate                        | 2,6             | 1,5      | 4,4      | <0.001   |
| Adverse                             | 3,5             | 2,1      | 5,8      | <0.001   |
| D) Risk classification in ≥65 years |                 |          |          |          |
| Favorable                           | Reference       |          |          | -        |
| Intermediate                        | 1,0             | 0,7      | 1,4      | 0.864    |
| Adverse                             | 1,9             | 1,4      | 2,5      | <0.001   |

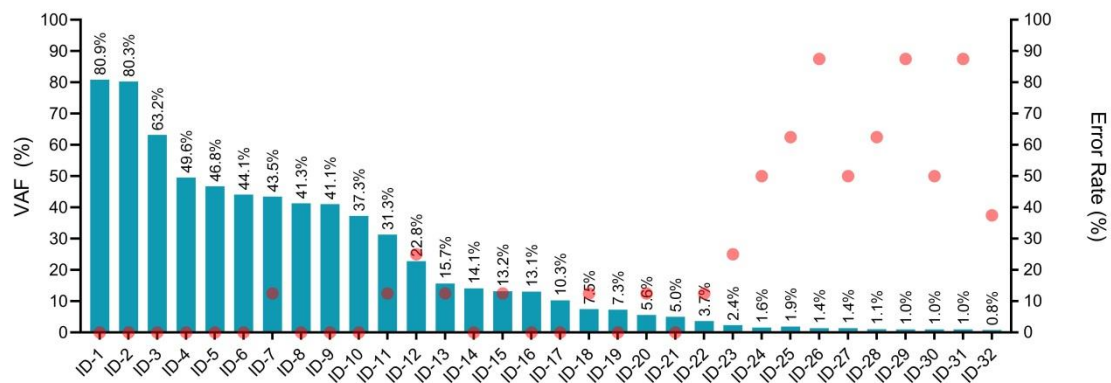

Figure S1. Third Cross-validation round results. Blue bars represent the allele frequency for the detected variants in the third cross-validation round. The red dots show the error rate in variant detection. The X-axis indicates the variant ID of table S2 for variant identification.

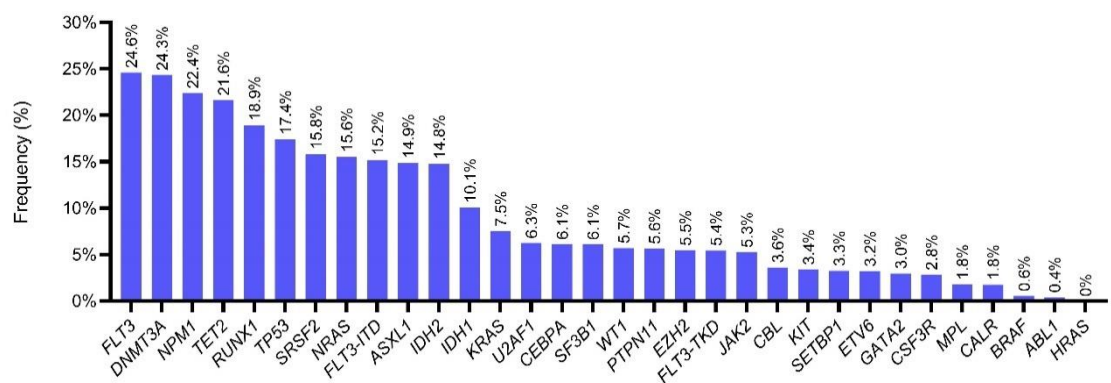

Figure S2. Mutational frequency of PETHEMA consensus genes in the global cohort (N=2856 samples).

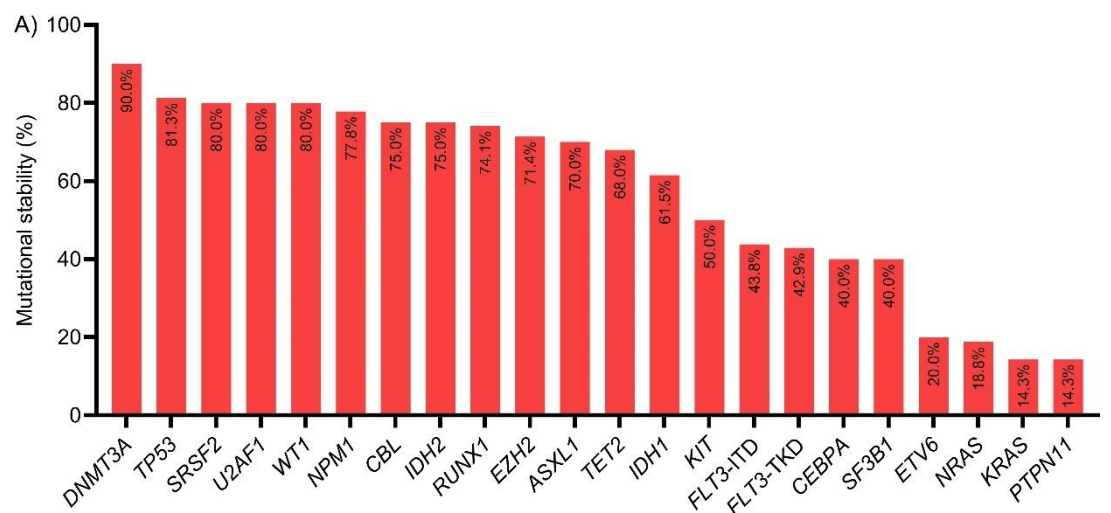

Figure S3. Stability rates in diagnosis-relapse samples (n=97 patients)



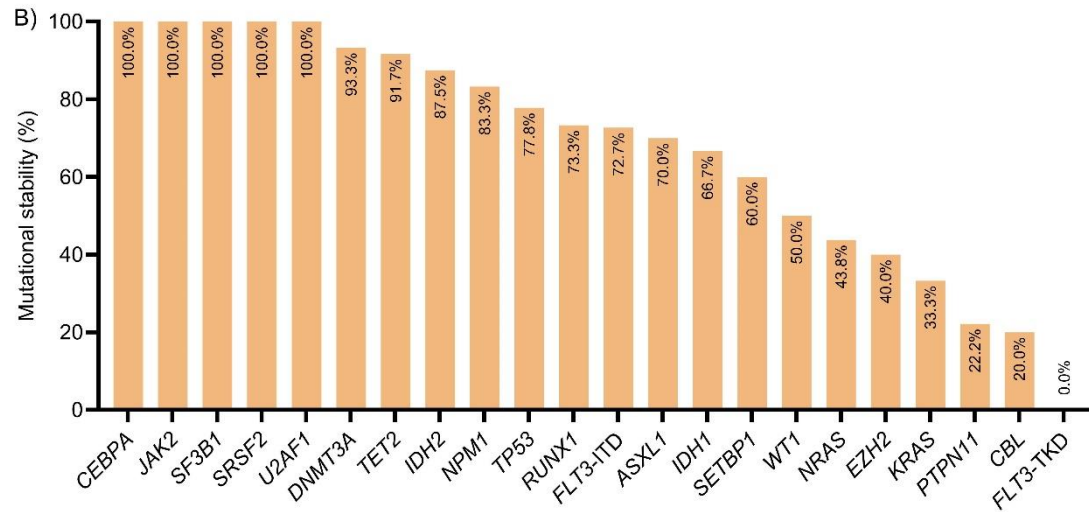

Figure S4. Stability rates in diagnosis-refractoriness samples (n=59 patients)

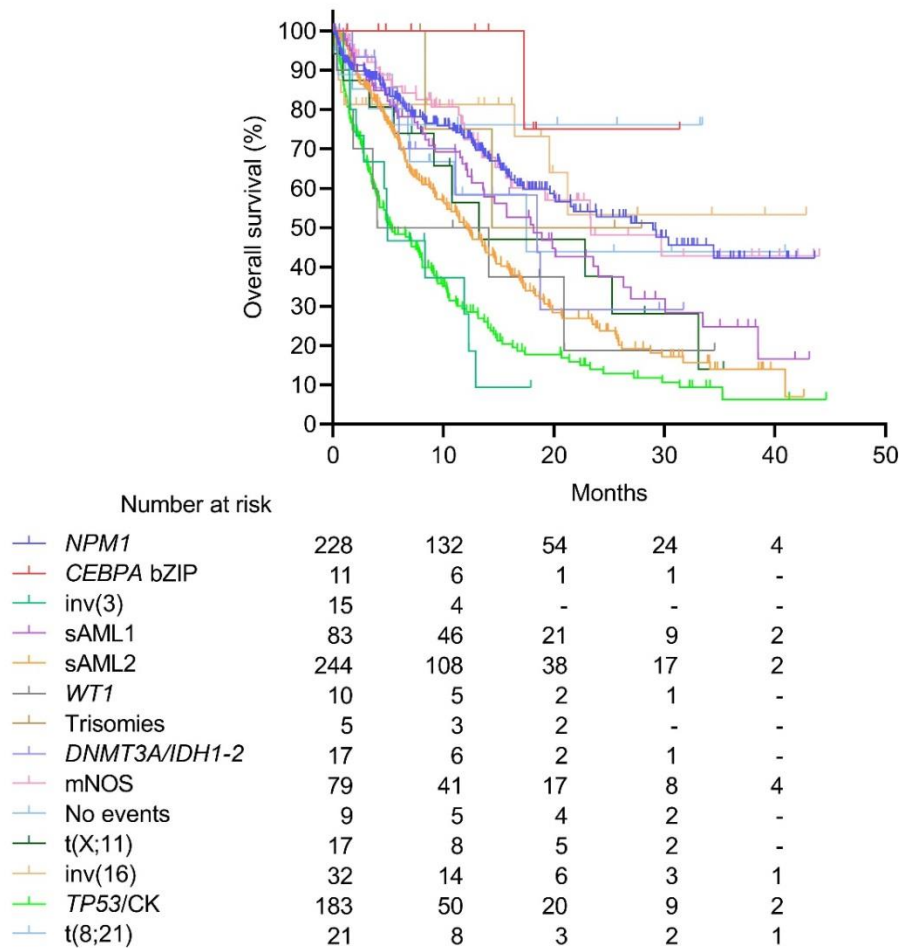

Figure S5. Overall survival curves according to AML molecular classes.

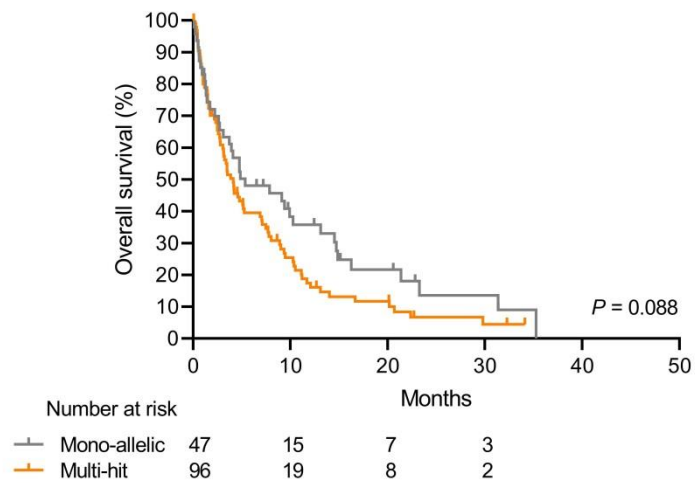

Figure S6: Overall survival curves of *TP53* mutated patients according to mono-allelic vs. multi-hit configurations.

### Genetic analyses

NGS studies were performed in central laboratories according to specific protocols and sequencing platforms. Cytogenetic and molecular data were anonymously recruited by the diagnostic platform.
